# Supplementary material for: Bean extract-based gargle for efficient diagnosing COVID-19 at early-stage using rapid antigen tests : a clinical, prospective, diagnostic study
Source: bioRxiv or medRxiv preprint supplement (doi:10.1101/2021.08.13.21261463), 2021-08-19
Supplement: Supplementary file [file media-1.pdf]

## Supplementary Appendix 1. Raw Data from 102 Patients with COVID-19

| Column | Description                                                                                                |
|--------|------------------------------------------------------------------------------------------------------------|
| 1      | Serial Number                                                                                              |
| 2      | Clinical Trial Patient Number                                                                              |
| 3      | Age range (years)                                                                                          |
| 4      | Sex (Man=1, Woman=2)                                                                                       |
| 5      | Hospitalization Period (day) (from hospitalization date to clinical trial date)                            |
| 6      | Hospitalization Period of Symptomatic case (day) (from symptoms onset date to clinical trial date)         |
| 7      | Hospitalization Period of Asymptomatic case (day) (from initial confirmed date to clinical trial date)     |
| 8      | Presence or absence of symptoms at diagnosis (presence=1, absence=2)                                       |
| 9      | Clinical Symptoms at diagnosis                                                                             |
| 10     | Routes of transmission/infection (close contact=1, unknown=2)                                              |
| 11     | Presence of SARS-CoV-2 Variant (Alpha=1, Delta=2)                                                          |
| 12     | NPS_PCR_Ct value, E gene                                                                                   |
| 13     | NPS_PCR_Ct value, RdRP gene                                                                                |
| 14     | NPS_PCR_Ct value, N gene                                                                                   |
| 15     | NPS_PCR_Result (Positive=1, Negative=2)                                                                    |
| 16     | Saliva_SARS-CoV-2 Antigen RDT [STANDARD Q COVID-19 Ag Saliva test (SD BIOSENSOR)] (Positive=1, Negative=2) |
| 17     | Saliva_SARS-CoV-2 Antigen RDT [Gmate® COVID-19 Ag Saliva (Philosys)] (Positive=1, Negative=2)              |
| 18     | Saliva_PCR_Result (Positive=1, Negative=2, Inconclusive=3)                                                 |
| 19     | Saliva_PCR_Ct value, RdRP gene                                                                             |
| 20     | Saliva_PCR_Ct value, E gene                                                                                |

## Supplementary Appendix 1. Raw Data from 102 Patients with COVID-19

| 1  | 2    | 3     | 4 | 5  | 6   | 7  | 8 | 9                                                                  | 10 | 11 | 12    | 13    | 14    | 15 | 16 | 17 | 18 | 19       | 20       |
|----|------|-------|---|----|-----|----|---|--------------------------------------------------------------------|----|----|-------|-------|-------|----|----|----|----|----------|----------|
| 1  | J001 | 43~47 | 2 | 15 | 15  | 15 | 1 | fever, sore throat                                                 | 2  |    | 30.92 | 31.79 | 33.78 | 1  | 2  | 2  | 3  | 34.35    | negative |
| 2  | J003 | 33~37 | 1 | 5  | 8   | 8  | 1 | cough                                                              | 1  |    | 31.02 | 31.49 | 30.70 | 1  | 2  | 2  | 3  | 34.32    | negative |
| 3  | J005 | 36~40 | 1 | 5  | 7   | 7  | 2 |                                                                    | 1  |    | 28.73 | 29.17 | 28.69 | 1  | 2  | 2  | 1  | 26.77    | 26.06    |
| 4  | J006 | 77~81 | 1 | 11 | >11 | 11 | 1 | cough                                                              | 1  |    | 35.35 | 35.01 | 33.94 | 1  | 2  | 2  | 1  | 33.23    | 31.72    |
| 5  | J008 | 68~72 | 1 | 11 | 13  | 13 | 1 | fatigue, muscle ache                                               | 1  |    | 21.84 | 21.54 | 21.75 | 1  | 2  | 2  | 1  | 22.04    | 22.35    |
| 6  | J009 | 45~49 | 1 | 7  |     | 7  | 2 |                                                                    | 1  | 1  | 27.54 | 28.88 | 26.74 | 1  | 1  | 1  | 1  | 19.82    | 19.53    |
| 7  | J011 | 36~40 | 1 | 6  | 6   | 6  | 1 | fever, sputum, sore throat                                         | 2  | 1  | 16.12 | 17.78 | 15.38 | 1  | 1  | 1  | 1  | 13.05    | 13.29    |
| 8  | J012 | 44~48 | 1 | 6  | 6   | 6  | 1 | cough                                                              | 2  | 1  | 19.11 | 20.11 | 17.35 | 1  | 1  | 1  | 1  | 13.43    | 13.05    |
| 9  | J015 | 63~67 | 1 | 9  | 11  | 11 | 1 | fever, sore throat, cold sweat, chest tightness                    | 2  |    | 30.24 | 31.00 | 32.40 | 1  | 2  | 2  | 3  | negative | 34.00    |
| 10 | J016 | 61~65 | 2 | 9  | 11  | 11 | 1 | fever                                                              | 1  |    | 19.65 | 19.74 | 21.38 | 1  | 1  | 2  | 1  | 16.01    | 16.31    |
| 11 | J018 | 54~58 | 2 | 6  | 14  | 14 | 2 |                                                                    | 1  |    | 31.05 | 31.43 | 30.76 | 1  | 2  | 2  | 1  | 31.44    | 30.92    |
| 12 | J019 | 73~77 | 2 | 12 |     | 13 | 2 | cough, headache                                                    | 2  |    | 33.14 | 32.72 | 31.34 | 1  | 2  | 2  | 1  | 18.35    | 18.54    |
| 13 | J020 | 32~36 | 1 | 5  | 5   | 5  | 2 |                                                                    | 1  | 1  | 17.69 | 17.91 | 15.65 | 1  | 1  | 1  | 1  | 19.08    | 18.97    |
| 14 | J021 | 48~52 | 1 | 3  | 6   | 6  | 1 | muscle ache, chills, headache                                      | 1  | 1  | 20.57 | 21.30 | 18.53 | 1  | 1  | 1  | 1  | 12.69    | 12.72    |
| 15 | J022 | 61~65 | 2 | 4  | 4   | 4  | 1 | fever, cough                                                       | 1  |    | 20.64 | 20.43 | 19.62 | 1  | 1  | 1  | 1  | 17.59    | 17.84    |
| 16 | J023 | 33~37 | 1 | 3  | 3   | 3  | 1 | fever, sore throat, muscle ache                                    | 2  |    | 10.50 | 12.52 | 9.97  | 1  | 1  | 1  | 1  | 10.32    | 10.44    |
| 17 | J024 | 53~57 | 1 | 3  | 5   | 5  | 1 | fever, sore throat, muscle ache, cough                             | 2  |    | 11.93 | 14.58 | 10.90 | 1  | 1  | 1  | 1  | 10.56    | 10.74    |
| 18 | J025 | 51~55 | 1 | 3  |     | 4  | 2 |                                                                    | 1  |    | 24.43 | 21.57 | 21.21 | 1  | 1  | 1  | 1  | 17.46    | 17.64    |
| 19 | J026 | 18~22 | 2 | 2  |     | 3  | 2 |                                                                    | 1  |    | 16.76 | 18.78 | 16.33 | 1  | 1  | 1  | 1  | 12.07    | 12.07    |
| 20 | J027 | 53~57 | 1 | 4  | 4   | 4  | 1 | fever, chest tightness, headache, foreign body sensation of throat | 1  | 1  | 11.80 | 15.22 | 11.04 | 1  | 1  | 1  | 1  | 12.12    | 12.29    |
| 21 | J028 | 58~62 | 1 | 8  | >8  | 8  | 1 | dry mouth, fatigue                                                 | 1  |    | 32.56 | 31.92 | 33.08 | 1  | 2  | 2  | 1  | 21.31    | 20.89    |
| 22 | J029 | 57~61 | 1 | 10 | 12  | 12 | 1 | sore throat, fever, sputum, throat tightness                       | 2  |    | 31.13 | 31.07 | 33.96 | 1  | 2  | 2  | 1  | 28.04    | 27.46    |
| 23 | J031 | 81~85 | 1 | 9  |     | 9  | 2 |                                                                    | 1  |    | 37.87 | 36.69 | 37.67 | 1  | 2  | 2  | 1  | 29.19    | 28.24    |

## Supplementary Appendix 1. Raw Data from 102 Patients with COVID-19

| 1  | 2    | 3     | 4 | 5  | 6   | 7  | 8 | 9                                         | 10 | 11 | 12    | 13    | 14    | 15 | 16 | 17 | 18 | 19       | 20       |
|----|------|-------|---|----|-----|----|---|-------------------------------------------|----|----|-------|-------|-------|----|----|----|----|----------|----------|
| 24 | J032 | 32~36 | 1 | 6  | 6   | 6  | 1 | fever, flu sensation                      | 1  | 1  | 24.41 | 25.89 | 22.21 | 1  | 1  | 1  | 1  | 16.57    | 16.47    |
| 25 | J033 | 32~36 | 1 | 11 | 12  | 12 | 1 | fever, cough                              | 1  | 1  | 21.50 | 22.89 | 21.07 | 1  | 2  | 2  | 1  | 22.31    | 21.84    |
| 26 | J036 | 69~73 | 1 | 10 | 11  | 11 | 1 | sore throat                               | 2  |    | 34.38 | 34.95 | 33.19 | 1  | 2  | 2  | 3  | 35.96    | negative |
| 27 | J037 | 62~66 | 2 | 10 | 11  | 11 | 1 | dry mouth, fatigue                        | 1  |    | 30.56 | 32.47 | 29.71 | 1  | 2  | 2  | 2  | negative | negative |
| 28 | J038 | 60~64 | 1 | 11 |     | 11 | 2 |                                           | 1  |    | 38.65 | 39.3  | 38.73 | 1  | 2  | 2  | 2  | negative | negative |
| 29 | J040 | 58~62 | 1 | 3  |     | 4  | 2 |                                           | 1  |    | 12.94 | 14.55 | 18.58 | 1  | 1  | 1  | 1  | 15.03    | 14.98    |
| 30 | J041 | 19~23 | 1 | 3  |     | 4  | 2 |                                           | 1  |    | 16.26 | 15.7  | 19.59 | 1  | 1  | 1  | 1  | 10.13    | 10.15    |
| 31 | J042 | 49~53 | 1 | 2  |     | 3  | 2 |                                           | 2  |    | 23.61 | 23.18 | 24.12 | 1  | 1  | 1  | 1  | 18.71    | 18.44    |
| 32 | J043 | 36~40 | 1 | 2  | 2   | 2  | 1 | fever, sore throat,<br>muscle ache        | 2  |    | 15.78 | 15.95 | 17.27 | 1  | 1  | 1  | 1  | 17.14    | 15.61    |
| 33 | J044 | 56~60 | 1 | 2  | 4   | 4  | 1 | cough, rhinorrhea                         | 2  |    | 24.15 | 23.66 | 24.22 | 1  | 1  | 1  | 1  | 17.43    | 17.22    |
| 34 | J045 | 25~29 | 1 | 2  | 3   | 3  | 1 | sore throat                               | 1  |    | 15.94 | 15.52 | 19.08 | 1  | 1  | 1  | 1  | 13.63    | 13.2     |
| 35 | J047 | 49~53 | 2 | 7  |     | 7  | 2 |                                           | 1  |    | 33.61 | 34.81 | 32.29 | 1  | 2  | 2  | 2  | negative | negative |
| 36 | J048 | 34~38 | 1 | 2  | 3   | 3  | 1 | sputum                                    | 1  |    | 13.25 | 14.54 | 16.6  | 1  | 1  | 1  | 1  | 13.41    | 12.73    |
| 37 | J049 | 30~34 | 1 | 3  | >10 | 10 | 1 | decreased taste<br>sense, anosmia         | 1  |    | 35.33 | 35.46 | 36.64 | 1  | 2  | 2  | 1  | 31.6     | 30.66    |
| 38 | J050 | 74~78 | 2 | 4  | >10 | 10 | 2 |                                           | 2  |    | 33.49 | 32.53 | 35.67 | 1  | 2  | 2  | 1  | 31.52    | 30.56    |
| 39 | J051 | 51~55 | 2 | 5  | 12  | 12 | 1 | chills, sputum                            | 1  |    | 33.75 | 33.47 | 36.12 | 1  | 2  | 2  | 1  | 29.12    | 28.24    |
| 40 | J052 | 70~74 | 2 | 5  | 15  | 15 | 1 | cough                                     | 2  |    | 35.81 | 35.4  | 35.39 | 1  | 2  | 2  | 2  | negative | negative |
| 41 | J054 | 27~31 | 1 | 2  | 5   | 5  | 1 | cough, fever, cold<br>sweating            | 1  |    | 16.09 | 16.18 | 18.78 | 1  | 1  | 1  | 1  | 12.74    | 12.04    |
| 42 | J055 | 52~56 | 2 | 3  | 3   | 3  | 2 |                                           | 1  |    | 15.22 | 14.78 | 17.7  | 1  | 1  | 1  | 1  | 11.39    | 11.33    |
| 43 | J056 | 35~39 | 1 | 3  | 3   | 3  | 1 | cough, sputum, chills                     | 2  |    | 11.88 | 12.68 | 15.84 | 1  | 1  | 1  | 1  | 10.95    | 10.8     |
| 44 | J057 | 19~23 | 1 | 3  | 3   | 3  | 2 |                                           | 1  |    | 25.36 | 25.16 | 28.19 | 1  | 1  | 1  | 1  | 14.37    | 14.37    |
| 45 | J058 | 42~46 | 2 | 2  | 4   | 4  | 1 | cough, sputum                             | 1  |    | 16.2  | 15.96 | 18.85 | 1  | 1  | 1  | 1  | 18.65    | 18.15    |
| 46 | J060 | 50~54 | 2 | 14 | >14 | 14 | 2 |                                           | 2  |    | 34.95 | 36.13 | 34.72 | 1  | 2  | 2  | 1  | 35.34    | 34.86    |
| 47 | J061 | 30~34 | 1 | 2  | 3   | 3  | 1 | cough, muscle ache,<br>sputum, rhinorrhea | 1  |    | 15.68 | 16.13 | 19.2  | 1  | 1  | 1  | 1  | 13.2     | 13.6     |
| 48 | J062 | 43~47 | 1 | 2  |     | 2  | 2 |                                           | 1  |    | 12.65 | 14.43 | 16.69 | 1  | 1  | 1  | 1  | 15.81    | 15.05    |
| 49 | J064 | 81~85 | 1 | 5  | 12  | 12 | 2 |                                           | 2  |    | 27.55 | 28.21 | 29.25 | 1  | 1  | 1  | 1  | 24.16    | 24.44    |

## Supplementary Appendix 1. Raw Data from 102 Patients with COVID-19

| 1  | 2    | 3     | 4 | 5 | 6   | 7  | 8 | 9                                       | 10 | 11 | 12    | 13    | 14    | 15 | 16 | 17 | 18 | 19       | 20       |
|----|------|-------|---|---|-----|----|---|-----------------------------------------|----|----|-------|-------|-------|----|----|----|----|----------|----------|
| 50 | J065 | 52~56 | 2 | 9 | 11  | 11 | 1 | fever, cough                            | 2  |    | 33.08 | 33.73 | 31.98 | 1  | 2  | 2  | 3  | negative | 35.54    |
| 51 | J068 | 37~41 | 2 | 2 |     | 2  | 2 |                                         | 2  |    | 13.22 | 14.57 | 18.17 | 1  | 1  | 1  | 1  | 22.37    | 21.62    |
| 52 | J069 | 29~33 | 1 | 2 | 2   | 2  | 1 | fatigue, dizness                        | 1  |    | 10.28 | 11.14 | 14.63 | 1  | 1  | 1  | 1  | 15.36    | 14.65    |
| 53 | J070 | 74~78 | 2 | 5 | 8   | 8  | 1 | fever and chills                        | 2  |    | 36.74 | 35.49 | 37.58 | 1  | 2  | 2  | 3  | negative | 35.02    |
| 54 | J071 | 28~32 | 1 | 6 | 6   | 6  | 1 | cough, fever                            | 2  |    | 25.33 | 26.20 | 25.07 | 1  | 1  | 1  | 1  | 15.55    | 15.55    |
| 55 | J072 | 40~44 | 1 | 2 | 2   | 2  | 1 | sore throat, rhinorrhea                 | 2  |    | 15.48 | 15.30 | 18.6  | 1  | 1  | 1  | 1  | 14.03    | 13.2     |
| 56 | J073 | 37~41 | 1 | 2 | 2   | 2  | 1 | headache                                | 1  |    | 19.97 | 19.48 | 22.45 | 1  | 1  | 1  | 1  | 12.83    | 12.35    |
| 57 | J074 | 34~38 | 1 | 2 | 2   | 2  | 1 | cough                                   | 1  |    | 16.2  | 16.51 | 19.09 | 1  | 1  | 1  | 1  | 23.34    | 21.82    |
| 58 | J075 | 35~39 | 1 | 2 | 2   | 2  | 1 | cough, muscle ache                      | 1  |    | 15.75 | 15.74 | 18.53 | 1  | 1  | 1  | 1  | 17.21    | 15.74    |
| 59 | J081 | 50~54 | 1 | 4 | 8   | 8  | 1 | cough                                   | 2  |    | 21.03 | 20.54 | 24.21 | 1  | 1  | 1  | 1  | 23.38    | 23       |
| 60 | J086 | 29~33 | 2 | 7 | 8   | 8  | 1 | rhinorrhea, headache                    | 1  |    | 35.56 | 38.91 | 33.52 | 1  | 2  | 2  | 3  | negative | 34.49    |
| 61 | J093 | 18~22 | 1 | 6 | 6   | 6  | 1 | headache, sore throat, cough            | 1  |    | 18.16 | 19.12 | 18.61 | 1  | 1  | 1  | 1  | 18.36    | 16.99    |
| 62 | J094 | 70~74 | 1 | 6 | 6   | 6  | 2 |                                         | 1  |    | 24.00 | 24.72 | 23.71 | 1  | 1  | 1  | 1  | 18.21    | 17.00    |
| 63 | J096 | 42~46 | 2 | 6 | 6   | 6  | 1 | chills, cough                           | 1  |    | 16.64 | 17.81 | 16.74 | 1  | 1  | 1  | 1  | 18.28    | 17.07    |
| 64 | J097 | 46~50 | 2 | 6 | 9   | 9  | 1 | headache, chills, fever                 | 1  |    | 20.17 | 21.01 | 20.41 | 1  | 1  | 1  | 1  | 19.80    | 18.63    |
| 65 | J101 | 41~45 | 2 | 3 | 8   | 8  | 1 | cough, sputum, rhinorrhea               | 1  |    | 18.74 | 18.81 | 22.24 | 1  | 1  | 1  | 1  | 27.38    | 25.54    |
| 66 | J105 | 22~26 | 2 | 7 | 10  | 10 | 1 | sore throat, cough, nasal stuffness     | 1  |    | 31.35 | 33.08 | 31.21 | 1  | 2  | 2  | 2  | negative | negative |
| 67 | J107 | 57~61 | 1 | 9 | >10 | 10 | 2 |                                         | 1  |    | 28.79 | 30.09 | 28.73 | 1  | 2  | 2  | 1  | 31.51    | 29.40    |
| 68 | J116 | 24~28 | 2 | 3 | 4   | 4  | 1 | chills, cough, headache                 | 1  |    | 10.64 | 11.84 | 16.87 | 1  | 1  | 1  | 1  | 21.11    | 20.68    |
| 69 | J117 | 21~25 | 2 | 3 | 6   | 6  | 1 | sore throat, abdominal pain, diarrhea   | 1  |    | 20.61 | 20.37 | 24.58 | 1  | 1  | 1  | 1  | 12.74    | 12.79    |
| 70 | J121 | 34~38 | 1 | 7 | 9   | 9  | 1 | cough, muscle ache                      | 1  |    | 18.48 | 19.54 | 18.65 | 1  | 1  | 1  | 1  | 24.50    | 24.05    |
| 71 | J122 | 41~45 | 2 | 5 | 5   | 5  | 1 | dizness, sputum, fever, nasal stuffness | 2  |    | 26.74 | 27.51 | 30.08 | 1  | 1  | 1  | 1  | 20.72    | 19.70    |
| 72 | J123 | 27~31 | 1 | 6 |     | 7  | 2 | 4/12, AstraZeneca first shot            | 1  |    | 34.47 | 34.01 | 36.96 | 1  | 2  | 2  | 3  | negative | 34.67    |

## Supplementary Appendix 1. Raw Data from 102 Patients with COVID-19

| 1  | 2    | 3     | 4 | 5  | 6  | 7  | 8 | 9                                                            | 10 | 11 | 12    | 13    | 14    | 15 | 16 | 17 | 18 | 19       | 20       |
|----|------|-------|---|----|----|----|---|--------------------------------------------------------------|----|----|-------|-------|-------|----|----|----|----|----------|----------|
| 73 | J126 | 55~59 | 1 | 4  | 6  | 6  | 1 | chills, cough, sore throat                                   | 1  |    | 20.06 | 19.95 | 22.49 | 1  | 1  | 1  | 1  | 16.53    | 15.71    |
| 74 | J127 | 50~54 | 1 | 5  | 6  | 6  | 1 | cough                                                        | 1  |    | 19.29 | 18.98 | 22.25 | 1  | 1  | 1  | 1  | 12.99    | 12.39    |
| 75 | J129 | 21~25 | 2 | 9  | 12 | 12 | 1 | sore throat, abdominal pain, diarrhea                        | 1  |    | 29.72 | 29.58 | 32.44 | 1  | 2  | 2  | 1  | 26.65    | 25.62    |
| 76 | J130 | 55~59 | 2 | 7  | 10 | 10 | 1 | chills, muscle ache                                          | 1  |    | 34.88 | 35.04 | 32.97 | 1  | 2  | 2  | 2  | negative | negative |
| 77 | J131 | 31~35 | 2 | 6  | 7  | 7  | 1 | headache, muscle ache                                        | 1  |    | 27.17 | 27.18 | 26.31 | 1  | 1  | 1  | 1  | 16.13    | 15.62    |
| 78 | J144 | 46~50 | 1 | 9  | 10 | 10 | 1 | cough, muscle ache, fever                                    | 1  |    | 29.95 | 30.70 | 31.90 | 1  | 2  | 2  | 1  | 32.10    | 30.09    |
| 79 | J145 | 55~59 | 1 | 7  | 13 | 13 | 1 | sputum, sore throat                                          | 1  |    | 24.73 | 34.37 | 28.64 | 1  | 1  | 1  | 1  | 24.51    | 22.89    |
| 80 | J146 | 67~71 | 1 | 11 | 12 | 12 | 1 | muscle ache                                                  | 1  |    | 24.71 | 24.56 | 27.66 | 1  | 2  | 2  | 1  | 29.52    | 27.01    |
| 81 | J147 | 44~48 | 1 | 11 | 12 | 12 | 1 | fever, entry from Cambodia                                   | 2  |    | 35.82 | 38.11 | 35.94 | 1  | 2  | 2  | 1  | 34.44    | 32.41    |
| 82 | J148 | 40~44 | 1 | 13 | 14 | 14 | 1 | fever, sputum, 5/27, AstraZeneca first shot                  | 1  |    | 28.85 | 29.17 | 32.65 | 1  | 1  | 1  | 1  | 17.40    | 16.06    |
| 83 | J149 | 25~29 | 2 | 12 | 12 | 12 | 1 | cough, sputum, nasal stuffness, diarrhea, muscle ache, fever | 1  |    | 31.66 | 31.25 | 33.91 | 1  | 2  | 2  | 2  | negative | negative |
| 84 | J150 | 50~54 | 2 | 6  | 6  | 6  | 1 | cough, sputum, fever                                         | 1  |    | 22.71 | 23.11 | 24.70 | 1  | 1  | 1  | 1  | 24.10    | 21.82    |
| 85 | J151 | 46~50 | 2 | 5  | 9  | 9  | 2 |                                                              | 1  |    | 30.90 | 31.30 | 33.10 | 1  | 2  | 2  | 1  | 27.34    | 25.61    |
| 86 | J152 | 46~50 | 2 | 11 | 13 | 13 | 1 | headache, cough                                              | 1  |    | 31.25 | 31.79 | 34.32 | 1  | 2  | 2  | 1  | 27.11    | 25.20    |
| 87 | J153 | 20~24 | 1 | 13 | 15 | 15 | 1 | fever                                                        | 1  |    | 31.78 | 32.64 | 31.67 | 1  | 2  | 2  | 2  | negative | negative |
| 88 | J154 | 56~60 | 1 | 12 | 15 | 15 | 1 | common cold sense                                            | 2  |    | 34.65 | 37.05 | 36.33 | 1  | 2  | 2  | 2  | negative | negative |
| 89 | J155 | 44~48 | 2 | 14 | 14 | 14 | 1 | fever                                                        | 1  |    | 27.67 | 28.67 | 27.53 | 1  | 2  | 2  | 1  | 30.20    | 28.40    |
| 90 | J157 | 38~42 | 1 | 7  | 12 | 12 | 1 | chills, common cold sense                                    | 1  |    | 28.92 | 29.12 | 31.42 | 1  | 2  | 2  | 1  | 24.79    | 23.17    |
| 91 | J158 | 59~63 | 1 | 3  | 13 | 13 | 2 |                                                              | 1  |    | 34.66 | 34.20 | 32.29 | 1  | 2  | 2  | 3  | negative | 33.28    |
| 92 | J159 | 20~24 | 1 | 3  | 10 | 10 | 1 | fever, cough, diarrhea, body weight loss (5kg)               | 1  |    | 33.68 | 34.87 | 32.95 | 1  | 2  | 2  | 3  | negative | 33.23    |

## Supplementary Appendix 1. Raw Data from 102 Patients with COVID-19

| 1   | 2    | 3     | 4 | 5 | 6  | 7  | 8 | 9                                                    | 10 | 11 | 12    | 13    | 14    | 15 | 16 | 17 | 18 | 19    | 20    |
|-----|------|-------|---|---|----|----|---|------------------------------------------------------|----|----|-------|-------|-------|----|----|----|----|-------|-------|
| 93  | J160 | 62~66 | 2 | 2 | 9  | 9  | 1 | chills, muscle ache, anosmia, headache               | 2  |    | 27.18 | 27.79 | 30.50 | 1  | 2  | 2  | 1  | 27.30 | 26.19 |
| 94  | J161 | 44~48 | 1 | 2 | 11 | 11 | 1 | nausea, anosmia                                      | 1  |    | 30.82 | 31.94 | 30.61 | 1  | 2  | 2  | 1  | 33.84 | 33.28 |
| 95  | J162 | 37~41 | 1 | 4 | 6  | 6  | 1 | muscle ache, fever, cold sweating, entry from Russia | 2  | 2  | 18.84 | 19.25 | 19.37 | 1  | 1  | 1  | 1  | 17.85 | 17.52 |
| 96  | J165 | 35~39 | 1 | 6 | 12 | 12 | 1 | fever, cough, headache                               | 1  |    | 21.79 | 22.62 | 21.87 | 1  | 2  | 2  | 1  | 23.85 | 23.36 |
| 97  | J166 | 44~48 | 1 | 6 | 12 | 12 | 2 |                                                      | 1  |    | 22.95 | 24.28 | 22.47 | 1  | 2  | 2  | 1  | 30.24 | 29.53 |
| 98  | J167 | 23~27 | 2 | 3 | 6  | 6  | 1 | chills, cough                                        | 2  |    | 25.39 | 26.59 | 24.99 | 1  | 2  | 2  | 1  | 29.18 | 28.42 |
| 99  | J168 | 16~20 | 1 | 6 | 9  | 9  | 2 |                                                      | 1  |    | 19.15 | 18.92 | 22.07 | 1  | 2  | 2  | 1  | 26.01 | 25.14 |
| 100 | J171 | 16~20 | 1 | 7 | 8  | 8  | 1 | fever, rhinorrhea                                    | 1  |    | 22.62 | 23.98 | 23.06 | 1  | 2  | 2  | 1  | 27.46 | 26.73 |
| 101 | J173 | 43~47 | 2 | 4 | 5  | 5  | 1 | headache, sore throat, fever sensation               | 1  | 2  | 16.93 | 17.41 | 17.21 | 1  | 1  | 1  | 1  | 18.82 | 18.64 |
| 102 | J174 | 22~26 | 2 | 3 | 3  | 3  | 1 | headache, eye pain, fever, cough                     | 1  | 2  | 12.59 | 12.94 | 17.74 | 1  | 1  | 1  | 1  | 16.42 | 16.35 |

## Supplementary Appendix 2. Raw Data from 100 Healthy Individuals as Negative Control

| No. | Clinical Trial Healthy Control Number | Sex (Man=1, Woman=2) | Age range (years) | NPS_PCR_Ct value E gene | NPS_PCR_Ct value RdRP gene | NPS_PCR_Ct value N gene | NPS_PCR_Result (Positive=1, Negative=2) | Antigen RDT [STANDARD Q COVID-19 Ag Saliva test (SD BIOSENSOR)] (Positive=1, Negative=2) | Antigen RDT [Gmate® COVID-19 Ag Saliva (Philosys)] (Positive=1, Negative=2) | Saliva_PCR_Result (Positive=1, Negative=2, Inconclusive=3) | Saliva_PCR_Ct value RdRP gene | Saliva_PCR_Ct value E gene |
|-----|---------------------------------------|----------------------|-------------------|-------------------------|----------------------------|-------------------------|-----------------------------------------|------------------------------------------------------------------------------------------|-----------------------------------------------------------------------------|------------------------------------------------------------|-------------------------------|----------------------------|
| 1   | N001                                  | 2                    | 55~59             | negative                | negative                   | negative                | 2                                       | 2                                                                                        | 2                                                                           | 2                                                          | negative                      | negative                   |
| 2   | N002                                  | 1                    | 37~41             | negative                | negative                   | negative                | 2                                       | 2                                                                                        | 2                                                                           | 2                                                          | negative                      | negative                   |
| 3   | N003                                  | 2                    | 44~48             | negative                | negative                   | negative                | 2                                       | 2                                                                                        | 2                                                                           | 2                                                          | negative                      | negative                   |
| 4   | N004                                  | 2                    | 23~27             | negative                | negative                   | negative                | 2                                       | 2                                                                                        | 2                                                                           | 2                                                          | negative                      | negative                   |
| 5   | N005                                  | 2                    | 45~49             | negative                | negative                   | negative                | 2                                       | 2                                                                                        | 2                                                                           | 2                                                          | negative                      | negative                   |
| 6   | N006                                  | 1                    | 54~58             | negative                | negative                   | negative                | 2                                       | 2                                                                                        | 2                                                                           | 2                                                          | negative                      | negative                   |
| 7   | N007                                  | 2                    | 54~58             | negative                | negative                   | negative                | 2                                       | 2                                                                                        | 2                                                                           | 2                                                          | negative                      | negative                   |
| 8   | N008                                  | 2                    | 39~43             | negative                | negative                   | negative                | 2                                       | 2                                                                                        | 2                                                                           | 2                                                          | negative                      | negative                   |
| 9   | N009                                  | 2                    | 23~27             | negative                | negative                   | negative                | 2                                       | 2                                                                                        | 2                                                                           | 2                                                          | negative                      | negative                   |
| 10  | N010                                  | 2                    | 50~54             | negative                | negative                   | negative                | 2                                       | 2                                                                                        | 2                                                                           | 2                                                          | negative                      | negative                   |
| 11  | N011                                  | 2                    | 51~55             | negative                | negative                   | negative                | 2                                       | 2                                                                                        | 2                                                                           | 2                                                          | negative                      | negative                   |
| 12  | N012                                  | 2                    | 22~26             | negative                | negative                   | negative                | 2                                       | 2                                                                                        | 2                                                                           | 2                                                          | negative                      | negative                   |
| 13  | N013                                  | 2                    | 48~52             | negative                | negative                   | negative                | 2                                       | 2                                                                                        | 2                                                                           | 2                                                          | negative                      | negative                   |
| 14  | N014                                  | 1                    | 42~46             | negative                | negative                   | negative                | 2                                       | 2                                                                                        | 2                                                                           | 2                                                          | negative                      | negative                   |
| 15  | N015                                  | 2                    | 29~33             | negative                | negative                   | negative                | 2                                       | 2                                                                                        | 2                                                                           | 2                                                          | negative                      | negative                   |
| 16  | N016                                  | 2                    | 28~32             | negative                | negative                   | negative                | 2                                       | 2                                                                                        | 2                                                                           | 2                                                          | negative                      | negative                   |
| 17  | N017                                  | 1                    | 49~53             | negative                | negative                   | negative                | 2                                       | 2                                                                                        | 2                                                                           | 2                                                          | negative                      | negative                   |
| 18  | N018                                  | 2                    | 49~53             | negative                | negative                   | negative                | 2                                       | 2                                                                                        | 2                                                                           | 2                                                          | negative                      | negative                   |
| 19  | N019                                  | 2                    | 46~50             | negative                | negative                   | negative                | 2                                       | 2                                                                                        | 2                                                                           | 2                                                          | negative                      | negative                   |
| 20  | N020                                  | 2                    | 48~52             | negative                | negative                   | negative                | 2                                       | 2                                                                                        | 2                                                                           | 2                                                          | negative                      | negative                   |
| 21  | N021                                  | 2                    | 23~27             | negative                | negative                   | negative                | 2                                       | 2                                                                                        | 2                                                                           | 2                                                          | negative                      | negative                   |
| 22  | N022                                  | 2                    | 24~28             | negative                | negative                   | negative                | 2                                       | 2                                                                                        | 2                                                                           | 2                                                          | negative                      | negative                   |
| 23  | N023                                  | 2                    | 41~45             | negative                | negative                   | negative                | 2                                       | 2                                                                                        | 2                                                                           | 2                                                          | negative                      | negative                   |

## Supplementary Appendix 2. Raw Data from 100 Healthy Individuals as Negative Control

| No. | Clinical Trial Healthy Control Number | Sex (Man=1, Woman=2) | Age range (years) | NPS_PCR_Ct value E gene | NPS_PCR_Ct value RdRP gene | NPS_PCR_Ct value N gene | NPS_PCR_Result (Positive=1, Negative=2) | Antigen RDT [STANDARD Q COVID-19 Ag Saliva test (SD BIOSENSOR)] (Positive=1, Negative=2) | Antigen RDT [Gmate® COVID-19 Ag Saliva (Philosys)] (Positive=1, Negative=2) | Saliva_PCR_Result (Positive=1, Negative=2, Inconclusive=3) | Saliva_PCR_Ct value RdRP gene | Saliva_PCR_Ct value E gene |
|-----|---------------------------------------|----------------------|-------------------|-------------------------|----------------------------|-------------------------|-----------------------------------------|------------------------------------------------------------------------------------------|-----------------------------------------------------------------------------|------------------------------------------------------------|-------------------------------|----------------------------|
| 24  | N024                                  | 2                    | 46~50             | negative                | negative                   | negative                | 2                                       | 2                                                                                        | 2                                                                           | 2                                                          | negative                      | negative                   |
| 25  | N025                                  | 1                    | 46~50             | negative                | negative                   | negative                | 2                                       | 2                                                                                        | 2                                                                           | 2                                                          | negative                      | negative                   |
| 26  | N026                                  | 2                    | 41~45             | negative                | negative                   | negative                | 2                                       | 2                                                                                        | 2                                                                           | 2                                                          | negative                      | negative                   |
| 27  | N027                                  | 2                    | 23~27             | negative                | negative                   | negative                | 2                                       | 2                                                                                        | 2                                                                           | 2                                                          | negative                      | negative                   |
| 28  | N028                                  | 2                    | 47~51             | negative                | negative                   | negative                | 2                                       | 2                                                                                        | 2                                                                           | 2                                                          | negative                      | negative                   |
| 29  | N029                                  | 2                    | 22~26             | negative                | negative                   | negative                | 2                                       | 2                                                                                        | 2                                                                           | 2                                                          | negative                      | negative                   |
| 30  | N030                                  | 2                    | 45~49             | negative                | negative                   | negative                | 2                                       | 2                                                                                        | 2                                                                           | 2                                                          | negative                      | negative                   |
| 31  | N031                                  | 2                    | 38~42             | negative                | negative                   | negative                | 2                                       | 2                                                                                        | 2                                                                           | 2                                                          | negative                      | negative                   |
| 32  | N032                                  | 2                    | 45~49             | negative                | negative                   | negative                | 2                                       | 2                                                                                        | 2                                                                           | 2                                                          | negative                      | negative                   |
| 33  | N033                                  | 2                    | 54~58             | negative                | negative                   | negative                | 2                                       | 2                                                                                        | 2                                                                           | 2                                                          | negative                      | negative                   |
| 34  | N034                                  | 1                    | 51~55             | negative                | negative                   | negative                | 2                                       | 2                                                                                        | 2                                                                           | 2                                                          | negative                      | negative                   |
| 35  | N035                                  | 2                    | 54~58             | negative                | negative                   | negative                | 2                                       | 2                                                                                        | 2                                                                           | 2                                                          | negative                      | negative                   |
| 36  | N036                                  | 2                    | 50~54             | negative                | negative                   | negative                | 2                                       | 2                                                                                        | 2                                                                           | 2                                                          | negative                      | negative                   |
| 37  | N037                                  | 2                    | 48~52             | negative                | negative                   | negative                | 2                                       | 2                                                                                        | 2                                                                           | 2                                                          | negative                      | negative                   |
| 38  | N038                                  | 2                    | 39~43             | negative                | negative                   | negative                | 2                                       | 2                                                                                        | 2                                                                           | 2                                                          | negative                      | negative                   |
| 39  | N039                                  | 2                    | 41~45             | negative                | negative                   | negative                | 2                                       | 2                                                                                        | 2                                                                           | 2                                                          | negative                      | negative                   |
| 40  | N040                                  | 2                    | 38~42             | negative                | negative                   | negative                | 2                                       | 2                                                                                        | 2                                                                           | 2                                                          | negative                      | negative                   |
| 41  | N041                                  | 2                    | 41~45             | negative                | negative                   | negative                | 2                                       | 2                                                                                        | 2                                                                           | 2                                                          | negative                      | negative                   |
| 42  | N042                                  | 2                    | 47~51             | negative                | negative                   | negative                | 2                                       | 2                                                                                        | 2                                                                           | 2                                                          | negative                      | negative                   |
| 43  | N043                                  | 2                    | 41~45             | negative                | negative                   | negative                | 2                                       | 2                                                                                        | 2                                                                           | 2                                                          | negative                      | negative                   |
| 44  | N044                                  | 1                    | 42~46             | negative                | negative                   | negative                | 2                                       | 2                                                                                        | 2                                                                           | 2                                                          | negative                      | negative                   |
| 45  | N045                                  | 1                    | 34~38             | negative                | negative                   | negative                | 2                                       | 2                                                                                        | 2                                                                           | 2                                                          | negative                      | negative                   |
| 46  | N046                                  | 2                    | 23~27             | negative                | negative                   | negative                | 2                                       | 2                                                                                        | 2                                                                           | 2                                                          | negative                      | negative                   |



## Supplementary Appendix 2. Raw Data from 100 Healthy Individuals as Negative Control

| No. | Clinical Trial Healthy Control Number | Sex (Man=1, Woman=2) | Age range (years) | NPS_PCR_Ct value E gene | NPS_PCR_Ct value RdRP gene | NPS_PCR_Ct value N gene | NPS_PCR_Result (Positive=1, Negative=2) | Antigen RDT [STANDARD Q COVID-19 Ag Saliva test (SD BIOSENSOR)] (Positive=1, Negative=2) | Antigen RDT [Gmate® COVID-19 Ag Saliva (Philosys)] (Positive=1, Negative=2) | Saliva_PCR_Result (Positive=1, Negative=2, Inconclusive=3) | Saliva_PCR_Ct value RdRP gene | Saliva_PCR_Ct value E gene |
|-----|---------------------------------------|----------------------|-------------------|-------------------------|----------------------------|-------------------------|-----------------------------------------|------------------------------------------------------------------------------------------|-----------------------------------------------------------------------------|------------------------------------------------------------|-------------------------------|----------------------------|
| 47  | N047                                  | 2                    | 22~26             | negative                | negative                   | negative                | 2                                       | 2                                                                                        | 2                                                                           | 2                                                          | negative                      | negative                   |
| 48  | N048                                  | 1                    | 27~31             | negative                | negative                   | negative                | 2                                       | 2                                                                                        | 2                                                                           | 2                                                          | negative                      | negative                   |
| 49  | N049                                  | 2                    | 22~26             | negative                | negative                   | negative                | 2                                       | 2                                                                                        | 2                                                                           | 2                                                          | negative                      | negative                   |
| 50  | N050                                  | 1                    | 24~28             | negative                | negative                   | negative                | 2                                       | 2                                                                                        | 2                                                                           | 2                                                          | negative                      | negative                   |
| 51  | N051                                  | 1                    | 24~28             | negative                | negative                   | negative                | 2                                       | 2                                                                                        | 2                                                                           | 2                                                          | negative                      | negative                   |
| 52  | N052                                  | 2                    | 30~34             | negative                | negative                   | negative                | 2                                       | 2                                                                                        | 2                                                                           | 2                                                          | negative                      | negative                   |
| 53  | N053                                  | 2                    | 23~27             | negative                | negative                   | negative                | 2                                       | 2                                                                                        | 2                                                                           | 2                                                          | negative                      | negative                   |
| 54  | N054                                  | 2                    | 26~30             | negative                | negative                   | negative                | 2                                       | 2                                                                                        | 2                                                                           | 2                                                          | negative                      | negative                   |
| 55  | N055                                  | 1                    | 53~57             | negative                | negative                   | negative                | 2                                       | 2                                                                                        | 2                                                                           | 2                                                          | negative                      | negative                   |
| 56  | N056                                  | 1                    | 28~32             | negative                | negative                   | negative                | 2                                       | 2                                                                                        | 2                                                                           | 2                                                          | negative                      | negative                   |
| 57  | N057                                  | 1                    | 29~33             | negative                | negative                   | negative                | 2                                       | 2                                                                                        | 2                                                                           | 2                                                          | negative                      | negative                   |
| 58  | N058                                  | 1                    | 29~33             | negative                | negative                   | negative                | 2                                       | 2                                                                                        | 2                                                                           | 2                                                          | negative                      | negative                   |
| 59  | N059                                  | 1                    | 56~60             | negative                | negative                   | negative                | 2                                       | 2                                                                                        | 2                                                                           | 2                                                          | negative                      | negative                   |
| 60  | N060                                  | 2                    | 57~61             | negative                | negative                   | negative                | 2                                       | 2                                                                                        | 2                                                                           | 2                                                          | negative                      | negative                   |
| 61  | N061                                  | 2                    | 39~43             | negative                | negative                   | negative                | 2                                       | 2                                                                                        | 2                                                                           | 2                                                          | negative                      | negative                   |
| 62  | N062                                  | 2                    | 28~32             | negative                | negative                   | negative                | 2                                       | 2                                                                                        | 2                                                                           | 2                                                          | negative                      | negative                   |
| 63  | N063                                  | 1                    | 37~41             | negative                | negative                   | negative                | 2                                       | 2                                                                                        | 2                                                                           | 2                                                          | negative                      | negative                   |
| 64  | N064                                  | 1                    | 27~31             | negative                | negative                   | negative                | 2                                       | 2                                                                                        | 2                                                                           | 2                                                          | negative                      | negative                   |
| 65  | N065                                  | 1                    | 36~40             | negative                | negative                   | negative                | 2                                       | 2                                                                                        | 2                                                                           | 2                                                          | negative                      | negative                   |
| 66  | N066                                  | 1                    | 30~34             | negative                | negative                   | negative                | 2                                       | 2                                                                                        | 2                                                                           | 2                                                          | negative                      | negative                   |
| 67  | N067                                  | 2                    | 25~29             | negative                | negative                   | negative                | 2                                       | 2                                                                                        | 2                                                                           | 2                                                          | negative                      | negative                   |
| 68  | N068                                  | 1                    | 29~33             | negative                | negative                   | negative                | 2                                       | 2                                                                                        | 2                                                                           | 2                                                          | negative                      | negative                   |
| 69  | N069                                  | 2                    | 53~57             | negative                | negative                   | negative                | 2                                       | 2                                                                                        | 2                                                                           | 2                                                          | negative                      | negative                   |

## Supplementary Appendix 2. Raw Data from 100 Healthy Individuals as Negative Control

| No. | Clinical Trial Healthy Control Number | Sex (Man=1, Woman=2) | Age range (years) | NPS_PCR_Ct value E gene | NPS_PCR_Ct value RdRP gene | NPS_PCR_Ct value N gene | NPS_PCR_Result (Positive=1, Negative=2) | Antigen RDT [STANDARD Q COVID-19 Ag Saliva test (SD BIOSENSOR)] (Positive=1, Negative=2) | Antigen RDT [Gmate® COVID-19 Ag Saliva (Philosys)] (Positive=1, Negative=2) | Saliva_PCR_Result (Positive=1, Negative=2, Inconclusive=3) | Saliva_PCR_Ct value RdRP gene | Saliva_PCR_Ct value E gene |
|-----|---------------------------------------|----------------------|-------------------|-------------------------|----------------------------|-------------------------|-----------------------------------------|------------------------------------------------------------------------------------------|-----------------------------------------------------------------------------|------------------------------------------------------------|-------------------------------|----------------------------|
| 70  | N070                                  | 2                    | 31~35             | negative                | negative                   | negative                | 2                                       | 2                                                                                        | 2                                                                           | 2                                                          | negative                      | negative                   |
| 71  | N071                                  | 1                    | 37~41             | negative                | negative                   | negative                | 2                                       | 2                                                                                        | 2                                                                           | 2                                                          | negative                      | negative                   |
| 72  | N072                                  | 2                    | 38~42             | negative                | negative                   | negative                | 2                                       | 2                                                                                        | 2                                                                           | 2                                                          | negative                      | negative                   |
| 73  | N073                                  | 2                    | 22~26             | negative                | negative                   | negative                | 2                                       | 2                                                                                        | 2                                                                           | 2                                                          | negative                      | negative                   |
| 74  | N074                                  | 2                    | 36~40             | negative                | negative                   | negative                | 2                                       | 2                                                                                        | 2                                                                           | 2                                                          | negative                      | negative                   |
| 75  | N075                                  | 1                    | 52~56             | negative                | negative                   | negative                | 2                                       | 2                                                                                        | 2                                                                           | 2                                                          | negative                      | negative                   |
| 76  | N076                                  | 2                    | 43~47             | negative                | negative                   | negative                | 2                                       | 2                                                                                        | 2                                                                           | 2                                                          | negative                      | negative                   |
| 77  | N077                                  | 2                    | 43~47             | negative                | negative                   | negative                | 2                                       | 2                                                                                        | 2                                                                           | 2                                                          | negative                      | negative                   |
| 78  | N078                                  | 2                    | 31~35             | negative                | negative                   | negative                | 2                                       | 2                                                                                        | 2                                                                           | 2                                                          | negative                      | negative                   |
| 79  | N079                                  | 1                    | 56~60             | negative                | negative                   | negative                | 2                                       | 2                                                                                        | 2                                                                           | 2                                                          | negative                      | negative                   |
| 80  | N080                                  | 2                    | 29~33             | negative                | negative                   | negative                | 2                                       | 2                                                                                        | 2                                                                           | 2                                                          | negative                      | negative                   |
| 81  | N081                                  | 2                    | 46~50             | negative                | negative                   | negative                | 2                                       | 2                                                                                        | 2                                                                           | 2                                                          | negative                      | negative                   |
| 82  | N082                                  | 2                    | 46~50             | negative                | negative                   | negative                | 2                                       | 2                                                                                        | 2                                                                           | 2                                                          | negative                      | negative                   |
| 83  | N083                                  | 1                    | 48~52             | negative                | negative                   | negative                | 2                                       | 2                                                                                        | 2                                                                           | 2                                                          | negative                      | negative                   |
| 84  | N084                                  | 2                    | 37~41             | negative                | negative                   | negative                | 2                                       | 2                                                                                        | 2                                                                           | 2                                                          | negative                      | negative                   |
| 85  | N085                                  | 2                    | 36~40             | negative                | negative                   | negative                | 2                                       | 2                                                                                        | 2                                                                           | 2                                                          | negative                      | negative                   |
| 86  | N086                                  | 2                    | 25~29             | negative                | negative                   | negative                | 2                                       | 2                                                                                        | 2                                                                           | 2                                                          | negative                      | negative                   |
| 87  | N087                                  | 2                    | 21~25             | negative                | negative                   | negative                | 2                                       | 2                                                                                        | 2                                                                           | 2                                                          | negative                      | negative                   |
| 88  | N088                                  | 2                    | 34~38             | negative                | negative                   | negative                | 2                                       | 2                                                                                        | 2                                                                           | 2                                                          | negative                      | negative                   |
| 89  | N089                                  | 2                    | 24~28             | negative                | negative                   | negative                | 2                                       | 2                                                                                        | 2                                                                           | 2                                                          | negative                      | negative                   |
| 90  | N090                                  | 1                    | 42~46             | negative                | negative                   | negative                | 2                                       | 2                                                                                        | 2                                                                           | 2                                                          | negative                      | negative                   |
| 91  | N091                                  | 2                    | 26~30             | negative                | negative                   | negative                | 2                                       | 2                                                                                        | 2                                                                           | 2                                                          | negative                      | negative                   |
| 92  | N092                                  | 2                    | 24~28             | negative                | negative                   | negative                | 2                                       | 2                                                                                        | 2                                                                           | 2                                                          | negative                      | negative                   |

## Supplementary Appendix 2. Raw Data from 100 Healthy Individuals as Negative Control

| No. | Clinical Trial<br>Healthy<br>Control<br>Number | Sex<br>(Man=1,<br>Woman=2) | Age<br>range<br>(years) | NPS_PCR<br>_Ct value<br>E gene | NPS_PCR<br>_Ct value<br>RdRP gene | NPS_PCR<br>_Ct value<br>N gene | NPS_PCR<br>_Result<br>(Positive=1,<br>Negative=2) | Antigen RDT<br>[STANDARD Q<br>COVID-19 Ag<br>Saliva test (SD<br>BIOSENSOR)]<br>(Positive=1,<br>Negative=2) | Antigen RDT<br>[Gmate®<br>COVID-19 Ag<br>Saliva<br>(Philosys)]<br>(Positive=1,<br>Negative=2) | Saliva_PCR<br>_Result<br>(Positive=1,<br>Negative=2,<br>Inconclusive=3) | Saliva_PCR<br>_Ct value<br>RdRP gene | Saliva_PCR<br>_Ct value<br>E gene |
|-----|------------------------------------------------|----------------------------|-------------------------|--------------------------------|-----------------------------------|--------------------------------|---------------------------------------------------|------------------------------------------------------------------------------------------------------------|-----------------------------------------------------------------------------------------------|-------------------------------------------------------------------------|--------------------------------------|-----------------------------------|
| 93  | N093                                           | 1                          | 26~30                   | negative                       | negative                          | negative                       | 2                                                 | 2                                                                                                          | 2                                                                                             | 2                                                                       | negative                             | negative                          |
| 94  | N094                                           | 1                          | 58~62                   | negative                       | negative                          | negative                       | 2                                                 | 2                                                                                                          | 2                                                                                             | 2                                                                       | negative                             | negative                          |
| 95  | N095                                           | 2                          | 58~62                   | negative                       | negative                          | negative                       | 2                                                 | 2                                                                                                          | 2                                                                                             | 2                                                                       | negative                             | negative                          |
| 96  | N096                                           | 2                          | 49~53                   | negative                       | negative                          | negative                       | 2                                                 | 2                                                                                                          | 2                                                                                             | 2                                                                       | negative                             | negative                          |
| 97  | N097                                           | 1                          | 56~60                   | negative                       | negative                          | negative                       | 2                                                 | 2                                                                                                          | 2                                                                                             | 2                                                                       | negative                             | negative                          |
| 98  | N098                                           | 1                          | 38~42                   | negative                       | negative                          | negative                       | 2                                                 | 2                                                                                                          | 2                                                                                             | 2                                                                       | negative                             | negative                          |
| 99  | N099                                           | 1                          | 40~44                   | negative                       | negative                          | negative                       | 2                                                 | 2                                                                                                          | 2                                                                                             | 2                                                                       | negative                             | negative                          |
| 100 | N100                                           | 2                          | 56~60                   | negative                       | negative                          | negative                       | 2                                                 | 2                                                                                                          | 2                                                                                             | 2                                                                       | negative                             | negative                          |
